# Supplementary material for: Solution-processed white OLEDs with power efficiency over 90 lm W−1 by triplet exciton management with a high triplet energy level interfacial exciplex host and a high reverse intersystem crossing rate blue TADF emitter
Source: Royal Society of Chemistry journal article supplement (doi:10.1039/d1mh02060a), 2022-01-01
Supplement: d1mh02060a1.pdf [file d1mh02060a1.pdf]

Electronic Supplementary Information (ESI)

**Solution-processed white OLEDs with power efficiency over 90 lm W<sup>-1</sup>  
by triplet exciton management with a high triplet energy level  
interfacial exciplex host and a high reverse intersystem crossing rate  
blue TADF Emitter**

Liang Chen,<sup>ab</sup> Yufei Chang,<sup>ab</sup> Song Shi,<sup>ab</sup> Shumeng Wang<sup>\*a</sup> and Lixiang Wang<sup>\*ab</sup>

<sup>a</sup> State Key Laboratory of Polymer Physics and Chemistry, Changchun Institute of Applied Chemistry, Chinese Academy of Sciences, Changchun, 130022, P. R. China

<sup>b</sup> School of Applied Chemistry and Engineering, University of Science and Technology of China, Hefei 230026, P. R. China

**Corresponding Author**

\*E-mail: wangshumeng@ciac.ac.cn, lixiang@ciac.ac.cn

**The calculation of the reverse intersystem crossing (RISC) rate constant ( $k_{RISC}$ ):**

$$k_r = \frac{\Phi_F}{\tau_p} \quad (1)$$

$$\Phi_{PL} = \frac{k_r}{k_r + k_{IC}} \quad (2)$$

$$\Phi_F = \frac{k_r}{k_r + k_{IC} + k_{ISC}} \quad (3)$$

$$\Phi_{IC} = \frac{k_{IC}}{k_r + k_{IC} + k_{ISC}} \quad (4)$$

$$\Phi_{ISC} = 1 - \Phi_F - \Phi_{IC} = \frac{k_{ISC}}{k_r + k_{IC} + k_{ISC}} \quad (5)$$

$$\Phi_{RISC} = \frac{\Phi_{DF}}{\Phi_{ISC}} \quad (6)$$

$$k_{RISC} = \frac{k_p k_d \Phi_{DF}}{k_{ISC} \Phi_{DF}} \quad (7)$$

$$k_p = \frac{1}{\tau_p}; k_d = \frac{1}{\tau_d} \quad (8)$$

Where  $k_r$ ,  $k_{ISC}$ ,  $k_{RISC}$ ,  $k_p$ , and  $k_d$  stand for the rate of the radiative decay, the intersystem crossing, the reverse intersystem crossing, the prompt decay, and the delayed decay, respectively, while  $\Phi_{PL}$ ,  $\Phi_F$  and  $\Phi_{DF}$  are the photoluminescence quantum yield (PLQY) and the PLQY of the prompt and delayed part, respectively.

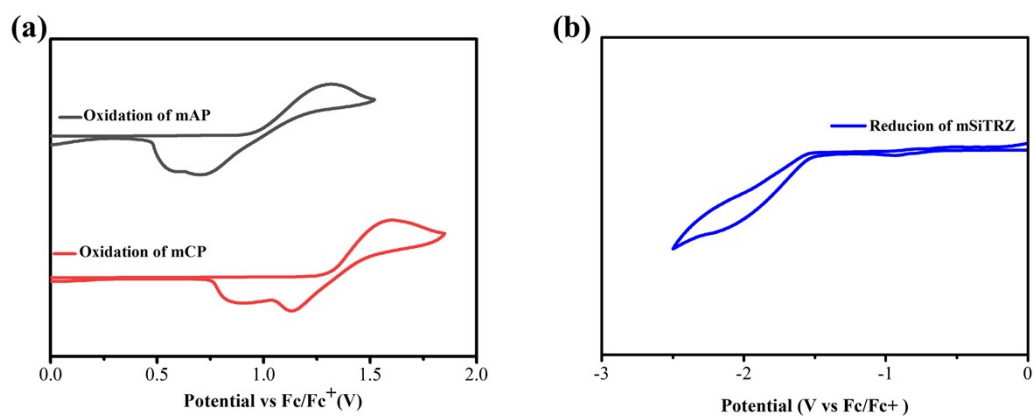

**Fig. S1** a) Cyclic voltammetry curves of mAP and mCP. b) Cyclic voltammetry curves of mSiTRZ.

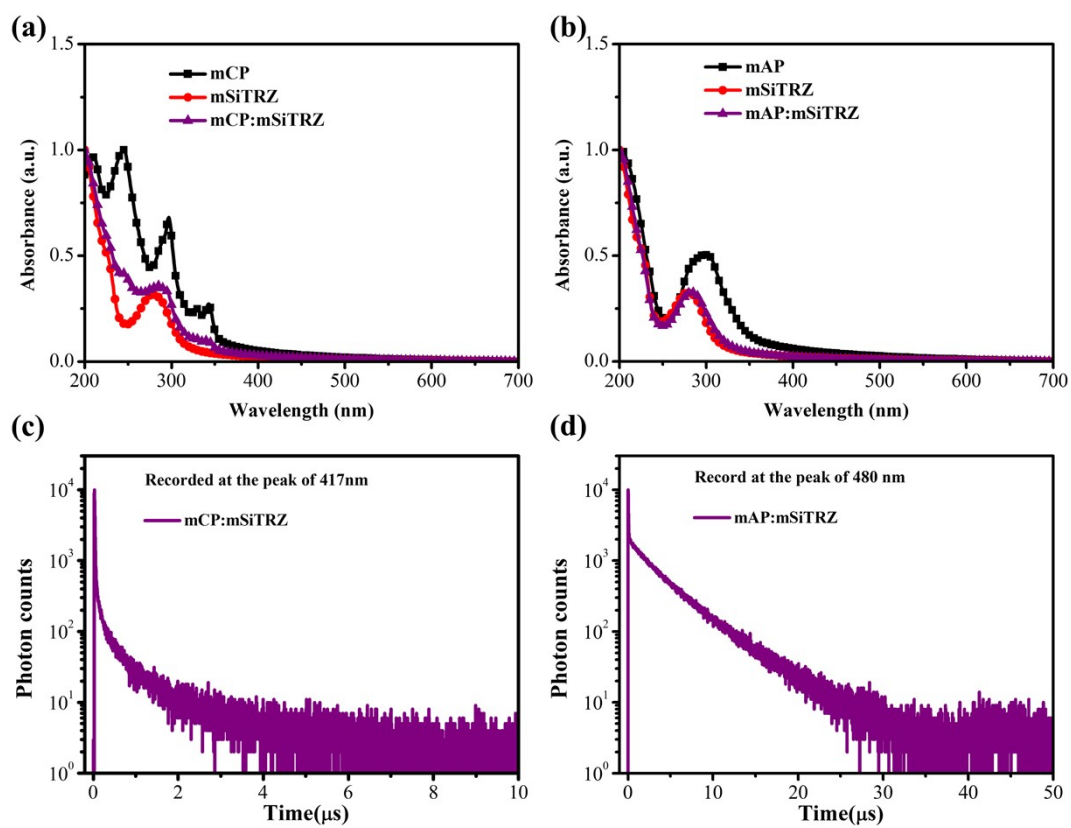

**Fig. S2** Optical characteristics of exciplex: a, b) UV-vis absorption spectra of constituent materials and mixed films. c, d) The transient PL spectra of exciplex.

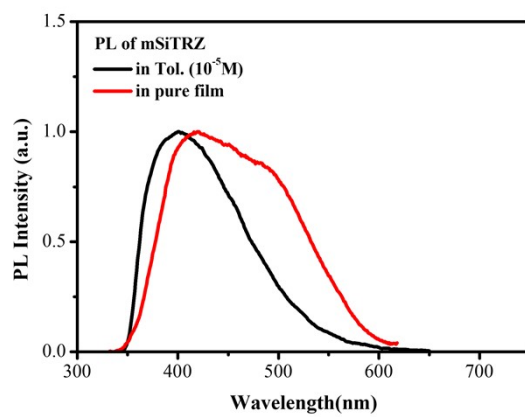

**Fig. S3** PL spectra of mSiTRZ in dilute solution and pure film.

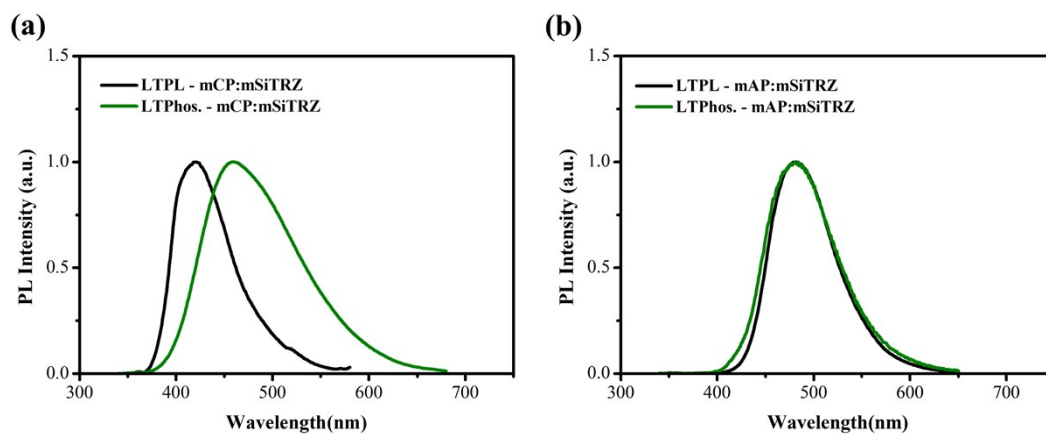

**Fig. S4** Low-temperature spectra of exciplex. a) mCP:mSiTRZ. b) mAP:mSiTRZ.

**Table S1.** Photophysical characteristics of exciplex.

| <b>Exciplex</b> | <b>PL <sup>a)</sup></b><br><b>[nm]</b> | <b>FWHM <sup>a)</sup></b><br><b>[nm]</b> | <b><math>\tau_d</math> <sup>b)</sup></b><br><b>[<math>\mu</math>s]</b> | <b>S<sub>1</sub> <sup>c)</sup></b><br><b>[eV]</b> | <b>T<sub>1</sub> <sup>d)</sup></b><br><b>[eV]</b> | <b><math>\Delta E_{ST}</math> <sup>e)</sup></b><br><b>[eV]</b> |
|-----------------|----------------------------------------|------------------------------------------|------------------------------------------------------------------------|---------------------------------------------------|---------------------------------------------------|----------------------------------------------------------------|
| mCP: mSiTRZ     | 417                                    | 66                                       | 0.36                                                                   | 3.26                                              | 3.15                                              | 0.11                                                           |
| mAP: mSiTRZ     | 480                                    | 75                                       | 3.58                                                                   | 2.91                                              | 2.90                                              | 0.01                                                           |

<sup>a)</sup>Obtained from the PL spectra of exciplex at 298 K. <sup>b)</sup>Average lifetime of delayed component determined from the transient PL spectra. <sup>c, d)</sup>Determined from the onset of the PL and phosphorescent spectra at 77 K. <sup>e)</sup>Calculated according to the equation:  $\Delta E_{ST} = S_1 - T_1$ .

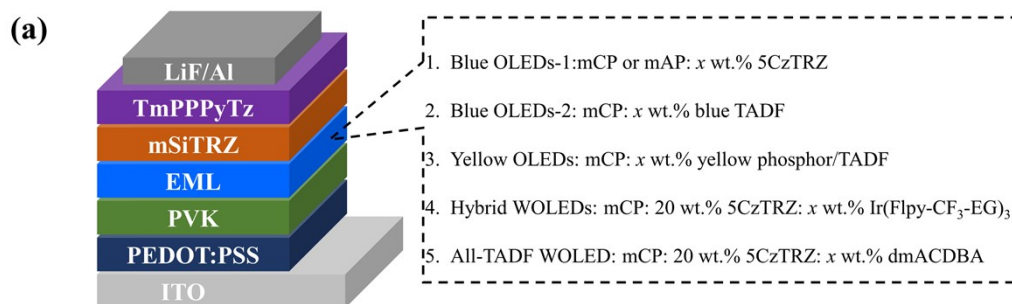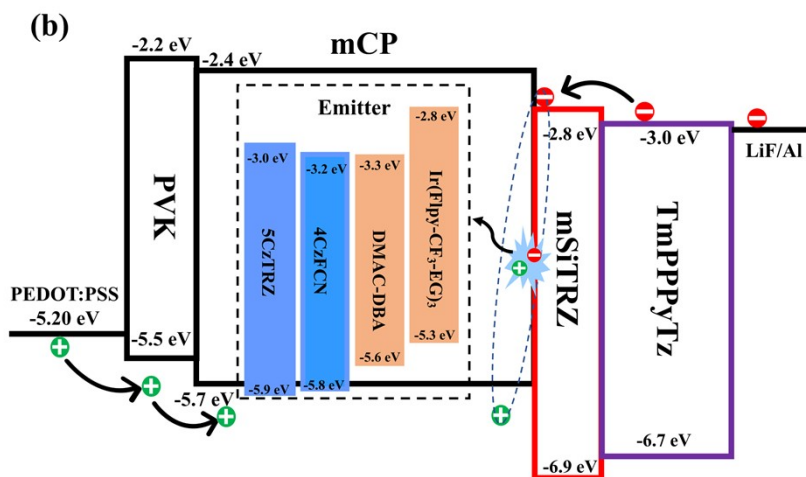

**Fig. S5** (a) The device structure used in this work. (b) The energy level diagram of the device



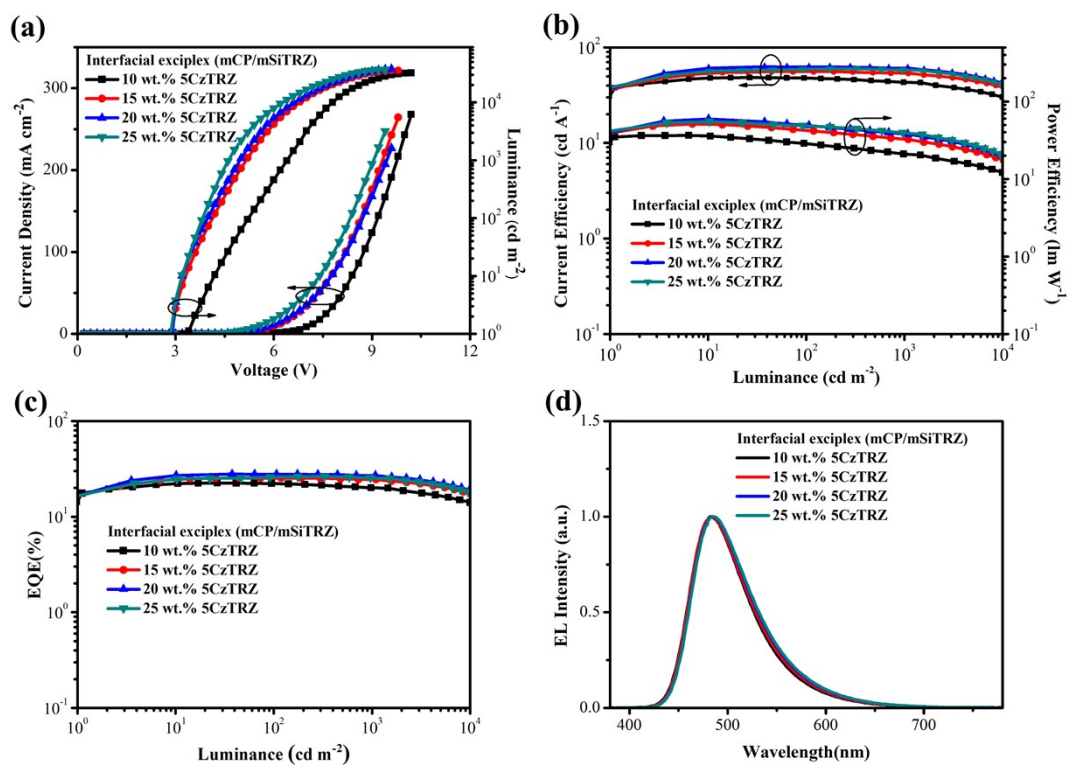

**Fig. S6** Performance of solution-processed blue TADF-OLEDs with mCP/mSiTRZ interfacial exciplex host. a) Current density-voltage-luminance characteristics. b) CE-luminance-PE characteristics. c) EQE-luminance characteristics. d) EL spectra at 1000 cd m<sup>-2</sup>.

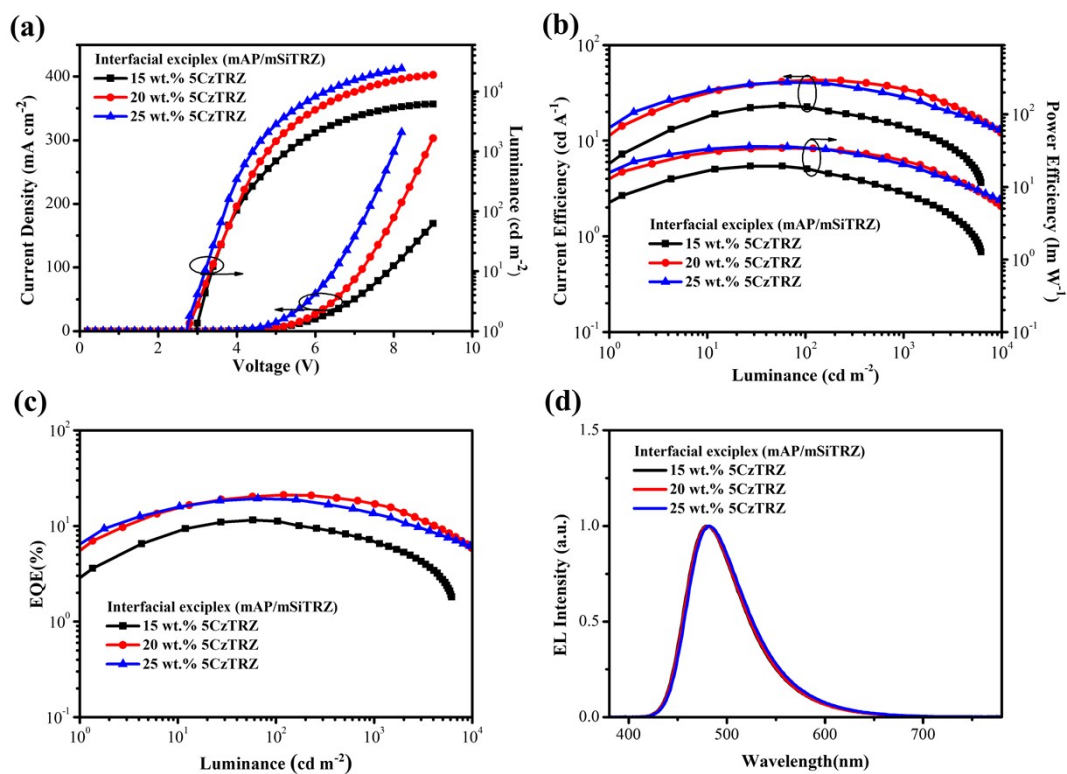

**Fig. S7** Performance of solution-processed blue TADF-OLEDs with mAP/mSiTRZ interfacial exciplex host. a) Current density-voltage-luminance characteristics. b) CE-luminance-PE characteristics. c) EQE-luminance characteristics. d) EL spectra at 1000 cd m<sup>-2</sup>.

**Table S2.** Summary of performance for solution-processed blue TADF-OLEDs based on interfacial exciplex host.

| Blue device  | $V_{on/1000/5000}^a)$<br>[V] | $CE_{max/1000/5000}^b)$<br>[cd A <sup>-1</sup> ] | $PE_{max/1000/5000}^c)$<br>[lm W <sup>-1</sup> ] | $EQE_{max/1000/5000}$<br>[%] | Roll-off <sub>1000/5000</sub><br>[%] | CIE<br>(x, y) |
|--------------|------------------------------|--------------------------------------------------|--------------------------------------------------|------------------------------|--------------------------------------|---------------|
| mCP/mSiTRZ   |                              |                                                  |                                                  |                              |                                      |               |
| 10wt% 5CzTRZ | 3.2/6.7/7.3                  | 48.3/42.9/35.4                                   | 36.5/21.0/15.3                                   | 22.5/20.0/16.5               | 11.1/26.6                            | (0.18, 0.35)  |
| 15wt% 5CzTRZ | 3.0/5.1/6.1                  | 55.8/53.8/45.2                                   | 51.2/32.8/23.2                                   | 25.5/24.6/20.6               | 3.5/19.2                             | (0.18, 0.36)  |
| 20wt% 5CzTRZ | 2.9/4.9/5.9                  | 62.9/61.2/49.7                                   | 62.5/39.2/26.4                                   | 28.1/27.3/22.2               | 2.8/21.0                             | (0.19, 0.37)  |
| 25wt% 5CzTRZ | 2.9/4.6/5.6                  | 59.7/58.1/48.5                                   | 55.1/39.7/27.4                                   | 26.2/25.5/21.4               | 2.7/18.3                             | (0.19, 0.38)  |
| mAP/mSiTRZ   |                              |                                                  |                                                  |                              |                                      |               |
| 15wt% 5CzTRZ | 3.0/5.3/7.8                  | 23.3/13.7/5.5                                    | 19.2/8.1/2.2                                     | 11.5/6.8/2.7                 | 40.9/75.2                            | (0.17, 0.31)  |
| 20wt% 5CzTRZ | 2.8/4.8/6.0                  | 43.0/34.6/18.6                                   | 34.2/22.6/9.7                                    | 21.1/17.0/9.0                | 19.4/57.3                            | (0.17, 0.32)  |
| 25wt% 5CzTRZ | 2.7/4.4/5.5                  | 40.9/28.6/16.6                                   | 35.9/20.4/9.4                                    | 19.4/13.5/7.8                | 30.4/59.8                            | (0.18, 0.34)  |

<sup>a)</sup> Operating voltage at 1/1000/5000 cd m<sup>-2</sup>. <sup>b)</sup> Current efficiency. <sup>c)</sup> Power efficiency.

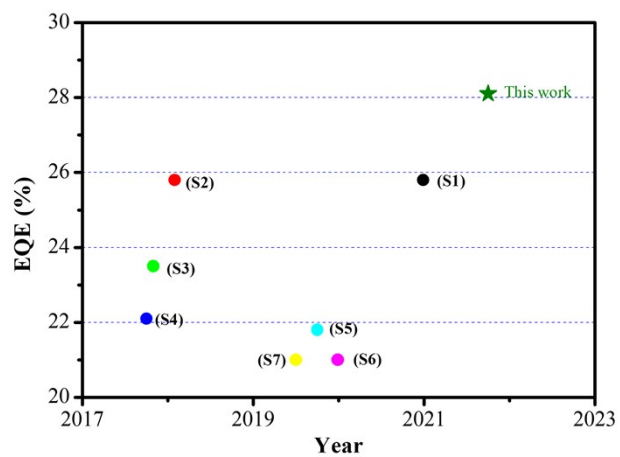

**Fig. S8** The EQE-Year of high-performance solution-processed blue TADF-OLEDs reported in the literature.

**Table S3.** Comparison of the high-performance solution-processed blue TADF-OLEDs reported in the literature.

| <b>Host:dopant</b>    | <b>V<sub>on</sub></b><br><b>[V]</b> | <b>PE<sub>max/1000</sub></b><br><b>[lm W<sup>-1</sup>]</b> | <b>EQE<sub>max/1000</sub></b><br><b>[%]</b> | <b>roll-off<sub>1000</sub></b><br><b>[%]</b> | <b>CIE<sub>1000</sub></b><br><b>(x, y)</b> | <b>Refs</b> |
|-----------------------|-------------------------------------|------------------------------------------------------------|---------------------------------------------|----------------------------------------------|--------------------------------------------|-------------|
| (mCP/mSiTRZ):5CzTRZ   | 2.9                                 | 62.5/39.2                                                  | 28.1/27.3                                   | 2.8                                          | (0.19, 0.37)                               | This work   |
| 2Cz2tCzBn             | ≈4.3                                | 41.5 /8.3                                                  | 25.8 /7.1                                   | 72.5                                         | (0.21, 0.42)                               | S1          |
| DPOBBPE:5CzCN         | ≈5.5                                | 27.1/--                                                    | 25.8/--                                     | --                                           | (0.17, 0.31)                               | S2          |
| Cz-3CzCN:Cz-4CzCN     | 3.5                                 | 35.2/--                                                    | 23.5/7.8                                    | 66.8                                         | (0.15, 0.30)                               | S3          |
| CzSi:MA-TA            | ≈5.0                                | --/--                                                      | 22.1/--                                     | --                                           | (0.15, 0.19)                               | S4          |
| (mCP/PO-T2T):4CzFCN   | 3.8                                 | 40.9/--                                                    | 21.8/12.4                                   | 43.1                                         | --                                         | S5          |
| DDMACPy:DMAC-TRZ      | 2.8                                 | 44.0/32.3                                                  | 21.0/18.7                                   | 11.0                                         | (0.17, 0.42)                               | S6          |
| T-CNDF-T- <i>t</i> Cz | 6.3                                 | 20.8/--                                                    | 21.0/--                                     | --                                           | (0.19, 0.35)                               | S7          |

a) Turn-on voltage at 1 cd m<sup>-2</sup>. b) Current efficiency. c) Power efficiency.

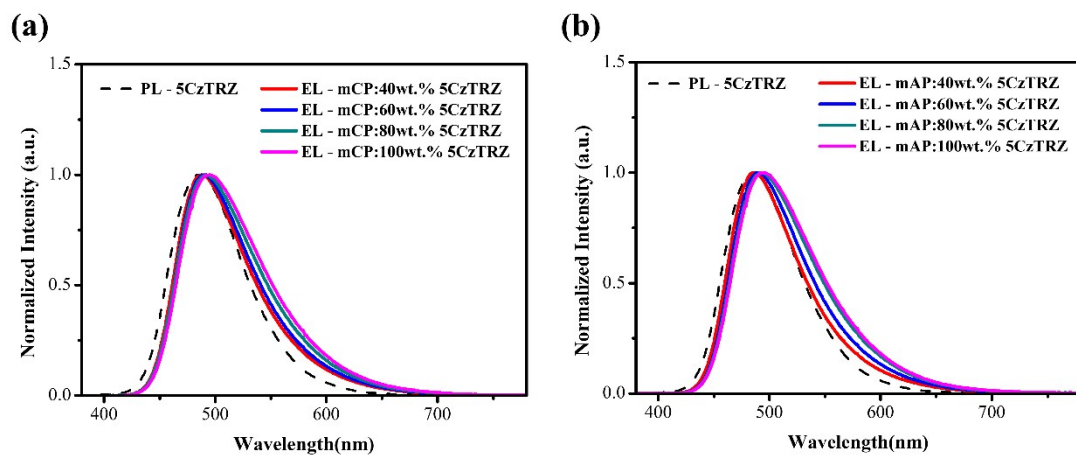

**Fig. S9** PL spectrum of 5CzTRZ and EL spectra of solution-processed blue devices at 1000 cd m<sup>-2</sup> with device structure of ITO/PEDOT:PSS/PVK/EML/mSiTRZ/TmPPPyTz/LiF/Al. a) EML= mCP: *x* wt.% 5CzTRZ. b) EML= mAP: *x* wt.% 5CzTRZ.

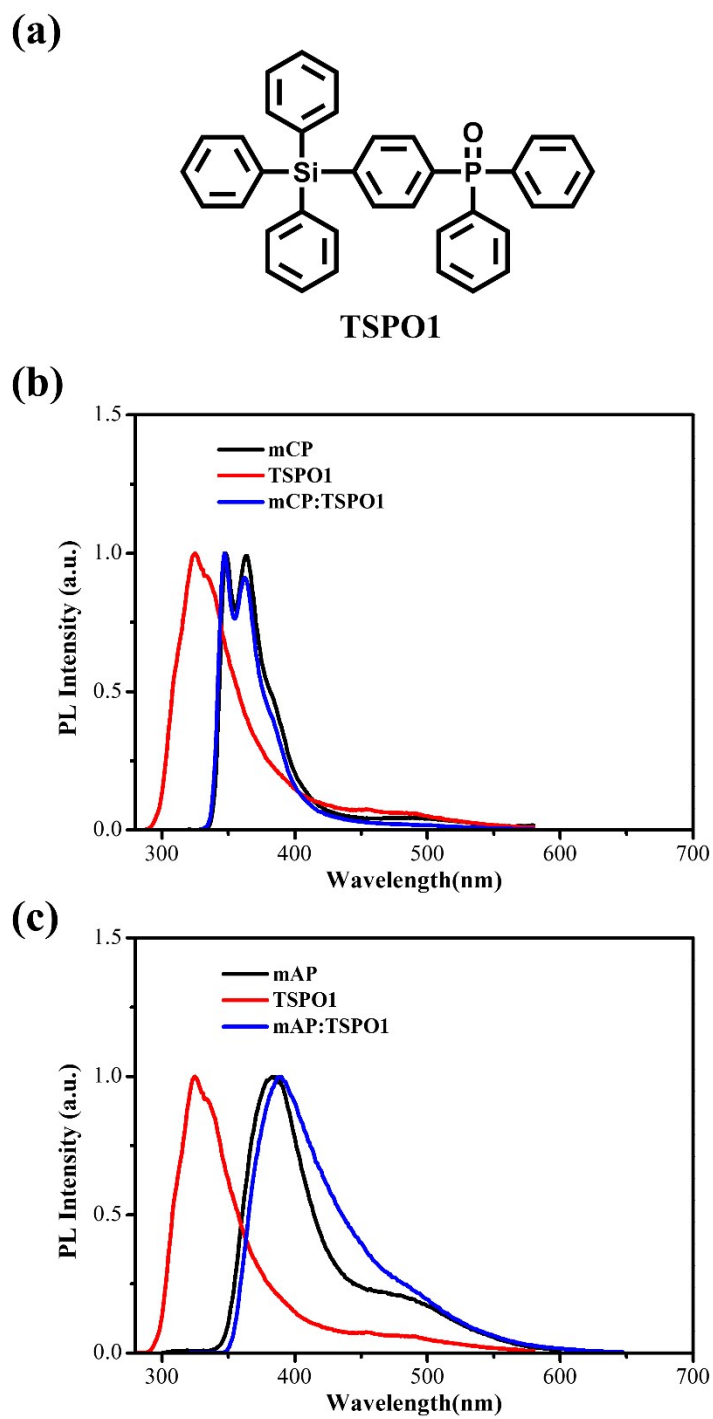

**Fig. S10** a) Chemical structure of TSPO1. b) PL spectra of mCP, TSPO1 and mCP:TSPO1 mixed films. c) PL spectra of mAP, TSPO1 and mAP:TSPO1 mixed films.

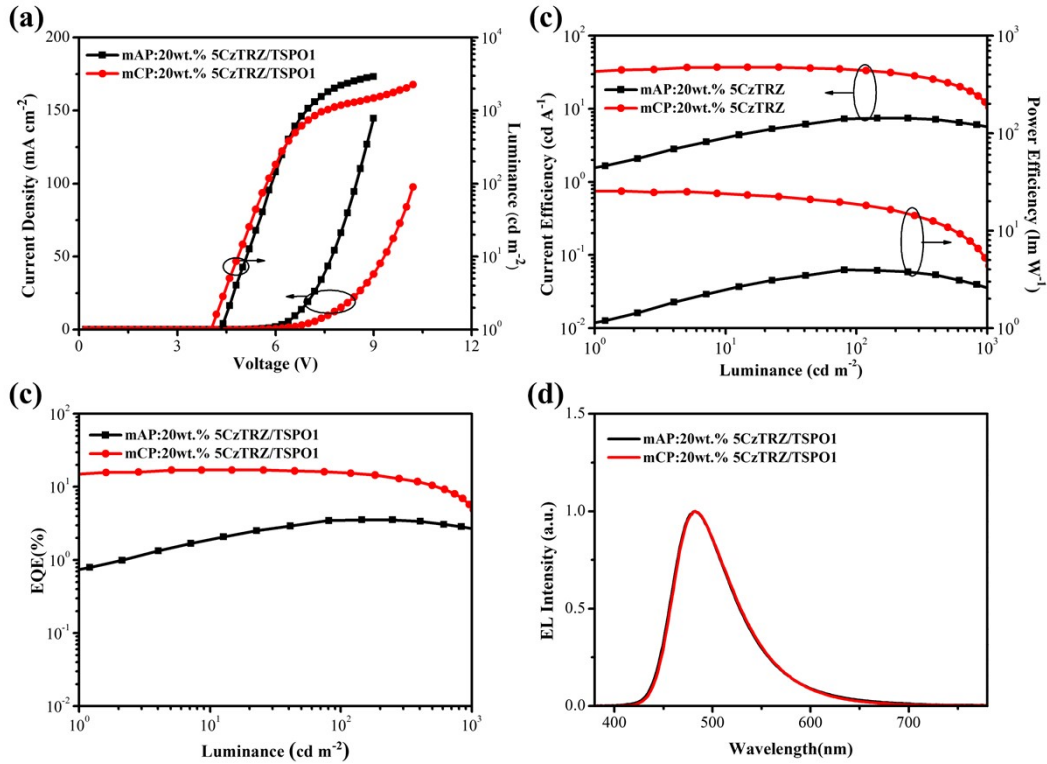

**Fig. S11** The solution-processed single-host OLEDs using TSP01 as exciton blocking layer (device structure: ITO/PEDOT:PSS/PVK/ mCP or mAP: 20 wt.% 5CzTRZ/TSP01/TmPPPyTz/LiF/Al). a) Current density-voltage-luminance characteristics. b) CE-luminance-PE characteristics. c) EQE-luminance characteristics. d) EL spectra at  $1000 \text{ cd m}^{-2}$ .



**Table S4.** Summary of performance for solution-processed single-host OLEDs using TSPO1 as exciton blocking layer.

| Device                    | $V_{on}$<br>[V] | Max performance        |                        |      | Device performance at 1000 $\text{cd m}^{-2}$ |                        |                        |     |              |
|---------------------------|-----------------|------------------------|------------------------|------|-----------------------------------------------|------------------------|------------------------|-----|--------------|
|                           |                 | CE <sup>b)</sup>       | PE <sup>c)</sup>       | EQE  | $V_d$                                         | CE                     | PE                     | EQE | CIE          |
|                           |                 | [ $\text{cd A}^{-1}$ ] | [ $\text{lm W}^{-1}$ ] | [%]  | [V]                                           | [ $\text{cd A}^{-1}$ ] | [ $\text{lm W}^{-1}$ ] | [%] | (x, y)       |
| mCP: 20 wt.% 5CzTRZ/TSPO1 | 4.2             | 37.0                   | 25.5                   | 17.1 | 7.6                                           | 10.5                   | 4.4                    | 4.9 | (0.19, 0.36) |
| mAP: 20 wt.% 5CzTRZ/TSPO1 | 4.3             | 7.5                    | 4.0                    | 3.5  | 7.0                                           | 5.7                    | 2.5                    | 2.7 | (0.18, 0.34) |

a) Turn-on voltage at 1  $\text{cd m}^{-2}$ . b) Current efficiency. c) Power efficiency.

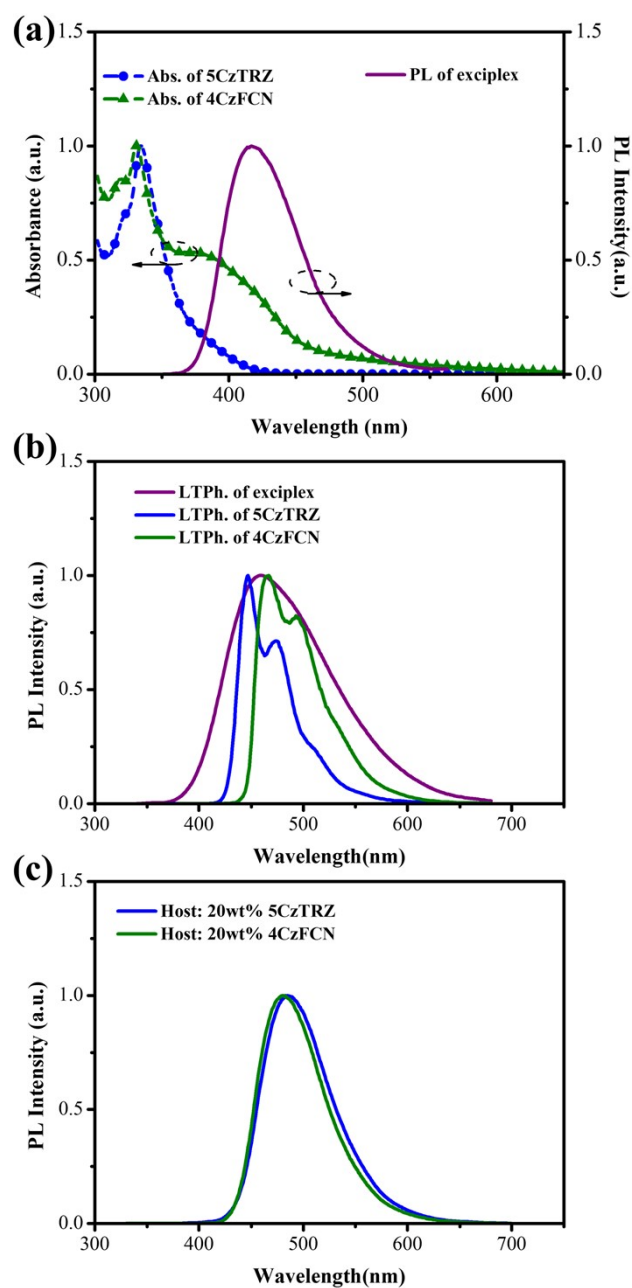

**Fig. S12** Optical characteristics of blue emitters. a) UV-vis absorption spectra of 5CzTRZ and 4CzFCN in toluene ( $10^{-5}$  M), and PL spectrum of exciplex in film. b) the low-temperature phosphorescence spectra. c) PL spectra in films with 20wt.% blue emitter doped in exciplex (D:A=1:1, by molar ratio).

**Table S5.** Optical characteristics of 5CzTRZ and 4CzFCN doped film samples.

| <b>Film samples<br/>[doped in exciplex]</b> | <b>PL <sup>a)</sup><br/>[nm]</b> | <b>FWHM <sup>a)</sup><br/>[nm]</b> | <b>PLQY <sup>b)</sup><br/>[%]</b> | <b><math>\tau_p</math> <sup>c)</sup><br/>[ns]</b> | <b><math>\tau_d</math> <sup>d)</sup><br/>[<math>\mu</math>s]</b> | <b><math>k_{\text{RISC}}</math> <sup>e)</sup><br/>[s<sup>-1</sup>]</b> |
|---------------------------------------------|----------------------------------|------------------------------------|-----------------------------------|---------------------------------------------------|------------------------------------------------------------------|------------------------------------------------------------------------|
| 20 wt.% 5CzTRZ                              | 485                              | 76                                 | 96                                | 10.9                                              | 2.36                                                             | $1.15 \times 10^7$                                                     |
| 20 wt.% 4CzFCN                              | 481                              | 74                                 | 83                                | 18.3                                              | 12.0                                                             | $1.31 \times 10^5$                                                     |

<sup>a)</sup> Obtained from the PL spectra at 298 K. <sup>b)</sup> Photoluminescence quantum yield of film samples measured in inert atmosphere. <sup>c, d)</sup> Lifetime of the prompt component and delayed component determined from the transient PL spectra. <sup>e)</sup> Reverse intersystem crossing rate constant calculated by PLQY and the transient PL spectra.

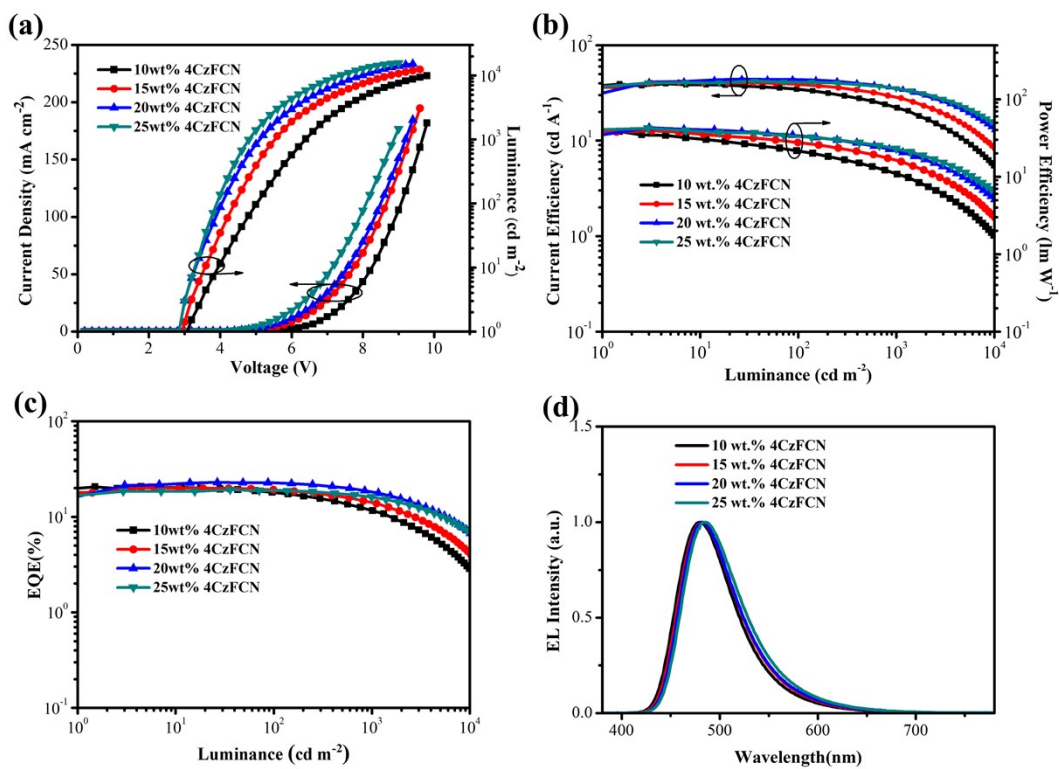

**Fig. S13** Performance of solution-processed blue TADF-OLEDs using 4CzFCN as emitter. a) Current density-voltage-luminance characteristics. b) CE-luminance-PE characteristics. c) EQE-luminance characteristics. d) EL spectra at  $1000 \text{ cd m}^{-2}$ .

**Table S6.** Summary of performance for solution-processed blue TADF-OLEDs based on mCP/ mSiTRZ interfacial exciplex host.

| Blue device | $V_{on/1000/5000}^a)$<br>[V] | $CE_{max/1000/5000}^b)$<br>[cd A <sup>-1</sup> ] | $PE_{max/1000/5000}^c)$<br>[lm W <sup>-1</sup> ] | $EQE_{max/1000/5000}$<br>[%] | $Roll-off_{1000/5000}$<br>[%] | CIE<br>(x, y) |              |
|-------------|------------------------------|--------------------------------------------------|--------------------------------------------------|------------------------------|-------------------------------|---------------|--------------|
| 10wt.%      | 4CzFCN                       | 3.1/6.4/8.1                                      | 39.4/22.0/10.0                                   | 38.3/10.8/3.0                | 20.7/11.6/5.3                 | 44.0/74.4     | (0.16, 0.29) |
|             | 5CzTRZ                       | 3.2/6.7/7.3                                      | 48.3/42.9/35.4                                   | 36.5/21.0/15.3               | 22.5/20.0/16/.5               | 11.1/26.6     | (0.18, 0.35) |
| 15wt.%      | 4CzFCN                       | 3.0/5.5/7.2                                      | 40.6/28.7/14.6                                   | 39.2/16.4/6.4                | 20.1/14.2/7.2                 | 29.4/64.2     | (0.17, 0.32) |
|             | 5CzTRZ                       | 3.0/5.1/6.1                                      | 55.8/53.8/45.2                                   | 51.2/32.8/23.2               | 25.5/24.6/20.6                | 3.5/19.2      | (0.18, 0.36) |
| 20wt.%      | 4CzFCN                       | 2.9/5.1/6.7                                      | 43.9/35.1/20.2                                   | 43.0/21.6/9.5                | 22.9/18.3/10.6                | 20.1/53.7     | (0.17, 0.33) |
|             | 5CzTRZ                       | 2.9/4.9/5.9                                      | 62.9/61.2/49.7                                   | 62.5/39.2/26.4               | 28.1/27.3/22.2                | 2.8/21.0      | (0.19, 0.37) |
| 25wt.%      | 4CzFCN                       | 2.9/4.8/6.2                                      | 42.1/35.2/22.1                                   | 42.2/23.0/11.2               | 19.3/16.1/10.1                | 16.6/47.7     | (0.18, 0.36) |
|             | 5CzTRZ                       | 2.9/4.6/5.6                                      | 59.7/58.1/48.5                                   | 55.1/39.7/27.4               | 26.2/25.5/21.4                | 2.7/18.3      | (0.19, 0.38) |

<sup>a)</sup> Operating voltage at 1/1000/5000 cd m<sup>-2</sup>. <sup>b)</sup>Current efficiency. <sup>c)</sup>Power efficiency.

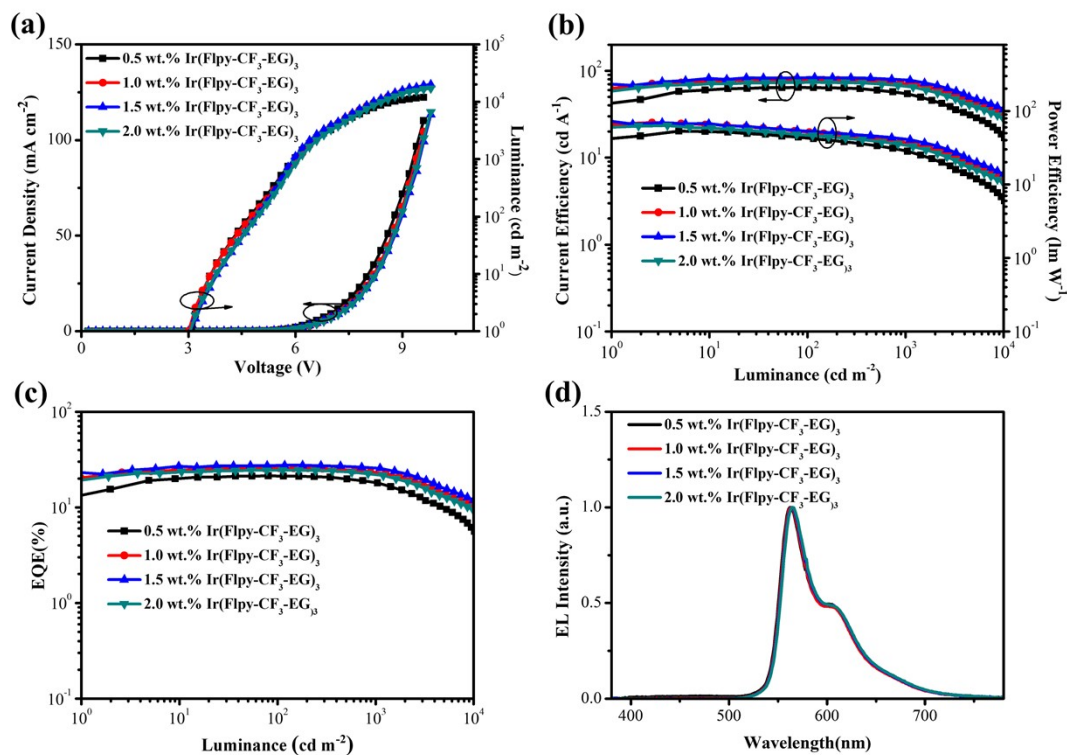

**Fig. S14** Performance of solution-processed yellow phosphorescent OLEDs using  $\text{Ir}(\text{Flpy-CF}_3\text{-EG})_3$  as emitter. a) Current density-voltage-luminance characteristics. b) CE-luminance-PE characteristics. c) EQE-luminance characteristics. d) EL spectra at  $1000 \text{ cd m}^{-2}$ .

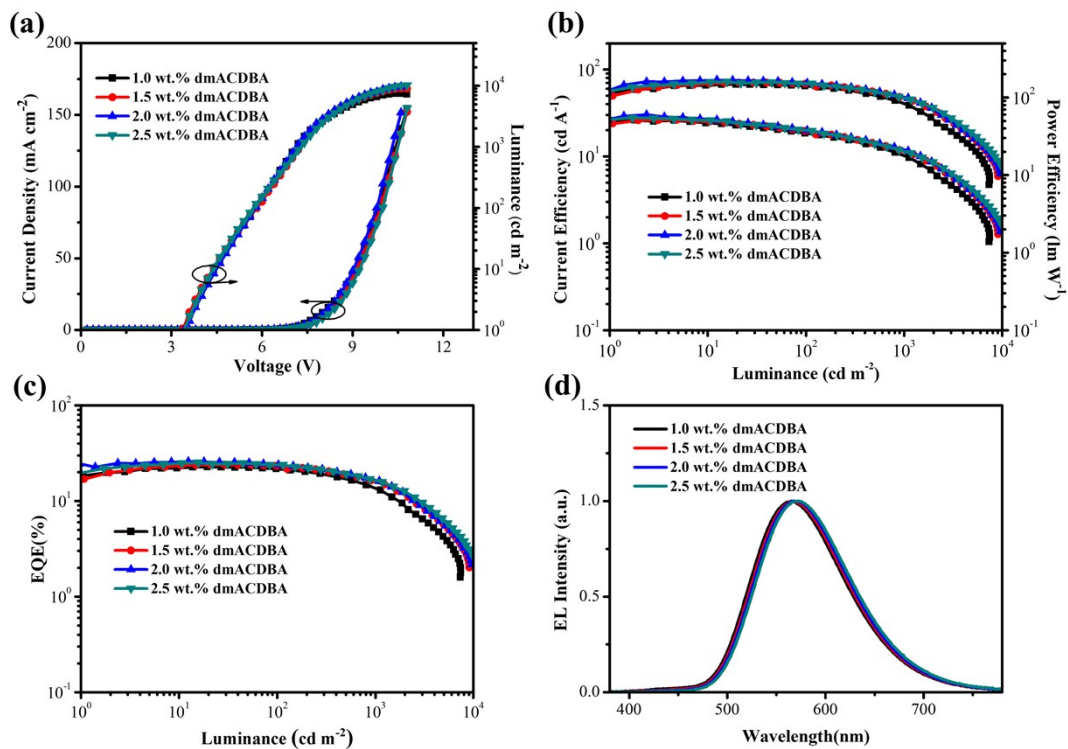

**Fig. S15** Performance of solution-processed yellow TADF-OLEDs using dmACDBA as emitter. a) Current density-voltage-luminance characteristics. b) CE-luminance-PE characteristics. c) EQE-luminance characteristics. d) EL spectra at 1000 cd m<sup>-2</sup>.

**Table S7.** Summary of performance for solution-processed yellow OLED devices based on interfacial exciplex host.

| Device                                          | $V_{on}^{a)}$<br>[V] | Max performance  |                  |      | Device performance at 1000 $cd\ m^{-2}$ |                  |                  |      |              |
|-------------------------------------------------|----------------------|------------------|------------------|------|-----------------------------------------|------------------|------------------|------|--------------|
|                                                 |                      | CE <sup>b)</sup> | PE <sup>c)</sup> | EQE  | $V_d$                                   | CE               | PE               | EQE  | CIE          |
|                                                 |                      | [ $cd\ A^{-1}$ ] | [ $lm\ W^{-1}$ ] | [%]  | [V]                                     | [ $cd\ A^{-1}$ ] | [ $lm\ W^{-1}$ ] | [%]  | (x, y)       |
| 0.5 % Ir(Flpy-CF <sub>3</sub> -EG) <sub>3</sub> | 3.1                  | 63.9             | 53.3             | 21.2 | 6.0                                     | 54.2             | 28.4             | 18.0 | (0.50, 0.49) |
| 1.0 % Ir(Flpy-CF <sub>3</sub> -EG) <sub>3</sub> | 3.0                  | 78.7             | 69.5             | 25.6 | 6.0                                     | 71.3             | 39.4             | 20.3 | (0.50, 0.49) |
| 1.5 % Ir(Flpy-CF <sub>3</sub> -EG) <sub>3</sub> | 3.0                  | 83.5             | 69.2             | 27.5 | 6.0                                     | 78.0             | 41.7             | 25.8 | (0.51, 0.49) |
| 2.0 % Ir(Flpy-CF <sub>3</sub> -EG) <sub>3</sub> | 3.0                  | 73.8             | 63.2             | 24.5 | 6.1                                     | 66.5             | 34.2             | 22.0 | (0.51, 0.49) |
| 1.0 % dmACDBA                                   | 3.4                  | 67.4             | 51.2             | 22.7 | 7.1                                     | 39.6             | 17.5             | 13.4 | (0.45, 0.52) |
| 1.5 % dmACDBA                                   | 3.4                  | 70.8             | 52.0             | 24.1 | 7.2                                     | 47.5             | 20.4             | 15.6 | (0.45, 0.52) |
| 2.0 % dmACDBA                                   | 3.4                  | 75.2             | 59.8             | 25.8 | 7.2                                     | 47.6             | 21.4             | 16.3 | (0.46, 0.51) |
| 2.5 % dmACDBA                                   | 3.4                  | 72.2             | 54.7             | 25.2 | 7.2                                     | 46.0             | 20.3             | 16.1 | (0.47, 0.51) |

a) Turn-on voltage at 1  $cd\ m^{-2}$ . b) Current efficiency. c) Power efficiency.



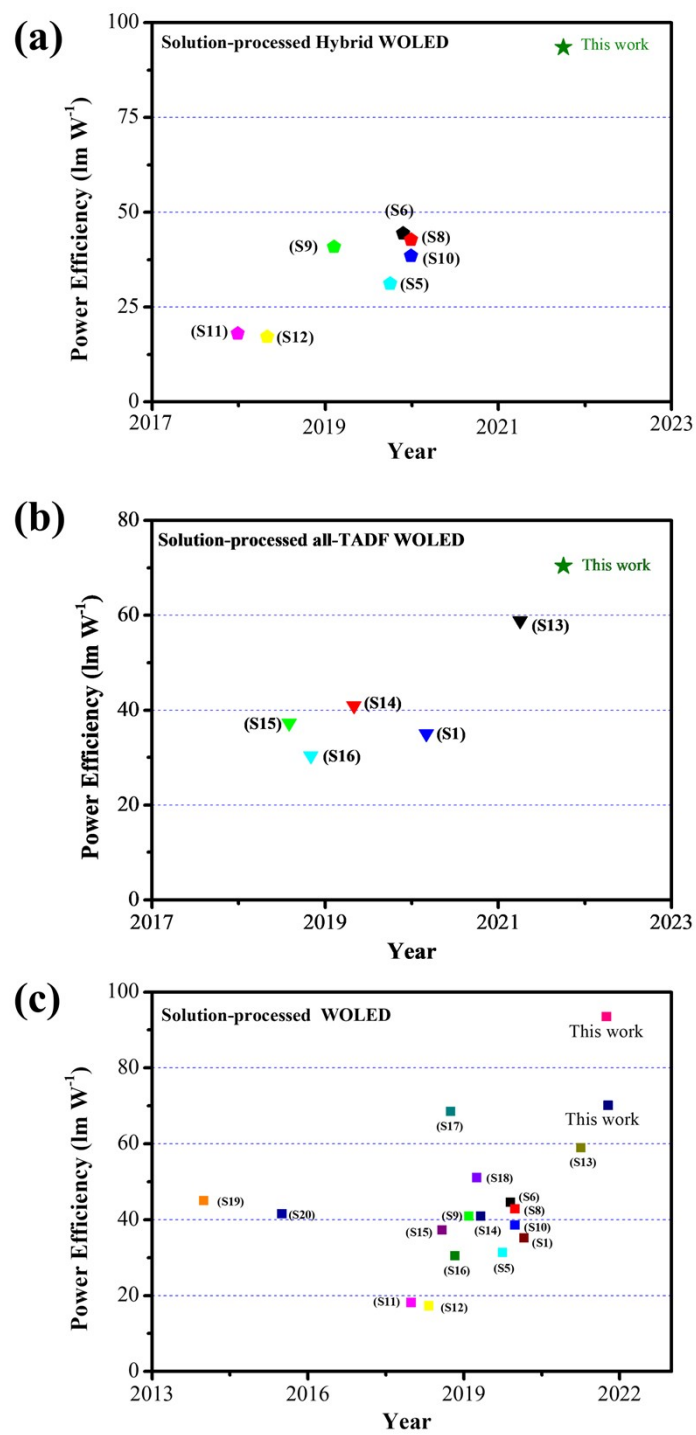

**Fig. S16** The PE-Year of high-performance solution-processed WOLEDs reported in the literature.

**Table S8.** Comparison of the high-performance solution-processed WOLEDs reported in the literature.

| Blue emitter     |                                        | Com. Color                                                                   | V <sub>on</sub><br>[V] | PE <sub>max/1000</sub><br>[lm W <sup>-1</sup> ] | EQE <sub>max/1000</sub><br>[%] | CIE<br>(x, y) | Ref.      |
|------------------|----------------------------------------|------------------------------------------------------------------------------|------------------------|-------------------------------------------------|--------------------------------|---------------|-----------|
| <b>Hybrid</b>    | 5CzTRZ                                 | Ir(Flpy-CF <sub>3</sub> -EG) <sub>3</sub>                                    | 2.7                    | 93.5/57.6                                       | 31.1/29.7                      | (0.40, 0.47)  | This work |
|                  | DMAC-TRZ                               | Ir(dpm)PQ <sub>2</sub> and<br>PO-01-TB                                       | 2.8                    | 44.5/31.5                                       | 17.4/16.2                      | (0.35, 0.44)  | S6        |
|                  | P-Ir6 (single white-emitting polymers) |                                                                              | 3.0                    | 42.8/35.0                                       | 17.4/17.1                      | (0.38, 0.43)  | S8        |
|                  | Cz-OCzBN                               | PO-01                                                                        | 3.4                    | 40.9/--                                         | 17.0/12.0                      | (0.34, 0.44)  | S9        |
|                  | PCz-4CzCN                              | PO-01                                                                        | 2.8                    | 38.5/--                                         | 18.1/17.8                      | (0.36, 0.47)  | S10       |
|                  | 4CzFCN                                 | Ir(MDQ) <sub>2</sub> acac                                                    | 4.1                    | 31.3/--                                         | 20.8/11.8                      | (0.33, 0.39)  | S5        |
|                  | DMAC-TRZ                               | Ir(dpm)PQ <sub>2</sub>                                                       | 3.6                    | 18.1/17.0                                       | 12.3/--                        | (0.36, 0.43)  | S11       |
|                  | 2CzPN                                  | Ir(MDQ) <sub>2</sub> (acac).                                                 | 4.6                    | 17.2/5.2                                        | 12.4/4.6                       | (0.36, 0.41)  | S12       |
| <b>All-TADF</b>  | 5CzTRZ                                 | dmACDBA                                                                      | 3.1                    | 70.4/31.0                                       | 27.3/22.8                      | (0.30, 0.45)  | This work |
|                  | BD-Cy                                  | YD-TF                                                                        | 2.8                    | 58.9/24.6                                       | 20.6/15.1                      | (0.31, 0.42)  | S13       |
|                  | SDPS-4PhCz                             | TXO-TPA                                                                      | 3.2                    | 40.9/--                                         | 17.6/--                        | (0.39, 0.44)  | S14       |
|                  | (CDBP:B4PyMPM)                         | TXO-TPA                                                                      | 3.0                    | 37.3/--                                         | 13.4/--                        | (0.35, 0.39)  | S15       |
|                  | 2tCz2CzBn                              | 3DMAC-BP                                                                     | --                     | 35.1/2.8                                        | 27.3/3.5                       | (0.34, 0.40)  | S1        |
|                  | Cz-3CzCN                               | Cz-4CzPN                                                                     | 3.9                    | 30.4/9.2                                        | 17.3/7.6                       | (0.34, 0.42)  | S16       |
| <b>All-Phos.</b> | Flr- <i>p</i> -OC <sub>8</sub>         | Ir(Flpy-CF <sub>3</sub> ) <sub>3</sub>                                       | 2.8                    | 68.5/47.0                                       | 23.6/20.6                      | (0.43, 0.44)  | S17       |
|                  | B-G2                                   | Ir(Flpy-CF <sub>3</sub> -EG) <sub>3</sub>                                    | 2.7                    | 51.5/23.5                                       | 19.3/15.6                      | (0.36, 0.40)  | S18       |
|                  | Ir(Fppy) <sub>3</sub>                  | Ir(ppy) <sub>3</sub> and (Ir(phq) <sub>3</sub><br>Ir(ppy) <sub>2</sub> acac, | 3.0                    | 45.0/--                                         | 22.0--/                        | (0.43, 0.43)  | S19       |
|                  | Firpic                                 | Ir(fppq) <sub>2</sub> acac and<br>Ir(bt) <sub>2</sub> acac                   | --                     | 41.8/22.8                                       | 16.1/14.7                      | (0.38, 0.47)  | S20       |

## Reference

- [S1] F.-M. Xie, Z.-D. An, M. Xie, Y.-Q. Li, G.-H. Zhang, S.-J. Zou, L. Chen, J.-D. Chen, T. Cheng, J.-X. Tang, *J. Mater. Chem. C* **2020**, *8*, 5769.
- [S2] S. K. Jeon, H.-J. Park, J. Y. Lee, *ACS Appl. Mater. Interfaces* **2018**, *10*, 5700.
- [S3] X. Ban, A. Zhu, T. Zhang, Z. Tong, W. Jiang, Y. Sun, *Chem. Commun.* **2017**, *53*, 11834.
- [S4] Y. Wada, S. Kubo, H. Kaji, *Adv. Mater.* **2018**, *30*, 1705641.
- [S5] Z. He, C. Wang, J. Zhao, X. Du, H. Yang, P. Zhong, C. Zheng, H. Lin, S. Tao, X. Zhang, *J. Mater. Chem. C* **2019**, *7*, 11806.
- [S6] P. S. Ngo, M.-K. Hung, K.-W. Tsai, S. Sharma, S.-A. Chen, *ACS Appl. Mater. Interfaces* **2019**, *11*, 45939.
- [S7] X. Zheng, R. Huang, C. Zhong, G. Xie, W. Ning, M. Huang, F. Ni, F. B. Dias, C. Yang, *Adv. Sci.* **2020**, *7*, 1902087.
- [S8] J. Hu, Q. Li, S. Shao, L. Wang, X. Jing, F. Wang, *Adv. Opt. Mater.* **2020**, *8*, 1902100.
- [S9] X. Ban, F. Chen, Y. Liu, J. Pan, A. Zhu, W. Jiang, Y. Sun, *Chem. Sci.* **2019**, *10*, 3054.
- [S10] X. Ban, Y. Liu, J. Pan, F. Chen, A. Zhu, W. Jiang, Y. Sun, Y. Dong, *ACS Appl. Mater. Interfaces* **2020**, *12*, 1190.
- [S11] J. Y. Wu, S. A. Chen, *ACS Appl. Mater. Interfaces* **2018**, *10*, 4851.
- [S12] W. Li, J. Zhao, L. Li, X. Du, C. Fan, C. Zheng, S. Tao, *Org. Electron.* **2018**, *58*, 276.
- [S13] X. Wang, J. Hu, J. Lv, Q. Yang, H. Tian, S. Shao, L. Wang, X. Jing, F. Wang, *Angew. Chem. Int. Ed.* **2021**, *60*, 2.
- [S14] R. Wang, Y. Liu, T. Hu, X. Wei, J. Liu, Z. Li, X. Hu, Y. Yi, P. Wang, Y. Wang, *Org. Electron.* **2019**, *71*, 24.
- [S15] Y. Liu, X. Wei, Z. Li, J. Liu, R. Wang, X. Hu, P. Wang, T. Qi, Y. Wang, *Adv. Opt. Mater.* **2018**, *6*, 1800978.
- [S16] X. Ban, F. Chen, Y. Zhao, A. Zhu, Z. Tong, W. Jiang, Y. Sun, *ACS Appl. Mater. Interfaces* **2018**, *10*, 37335.

- [S17] S. Wang, L. Zhao, B. Zhang, J. Ding, Z. Xie, L. Wang, W.-Y. Wong, *Iscience* 2018, **6**, 128.
- [S18] S. Wang, Z. Yan, J. Ding, L. Wang, *Adv. Mater. Technol.* **2019**, *4*, 1900137.
- [S19] N. Aizawa, Y. J. Pu, M. Watanabe, T. Chiba, K. Ideta, N. Toyota, M. Igarashi, Y. Suzuri, H. Sasabe, J. Kido, *Nat. Commun.* **2014**, *5*, 5756.
- [S20] S. Wang, B. Zhang, X. Wang, J. Ding, Z. Xie, L. Wang, *Adv. Opt. Mater.* **2015**, *3*, 1349.
